Development 137, 4327 (2010) doi:10.1242/dev.061747

**RPK2 is an essential receptor-like kinase that transmits the CLV3 signal in *Arabidopsis***  
**Atsuko Kinoshita, Shigeyuki Betsuyaku, Yuriko Osakabe, Shinji Mizuno, Shingo Nagawa, Yvonne Stahl, Rüdiger Simon, Kazuko Yamaguchi-Shinozaki, Hiroo Fukuda and Shinichiro Sawa**

A reference was omitted in *Development* **137**, 3911-3920.

In the first sentence on p. 3912, a paper by Jeong et al. (Jeong et al., 1999) should have been cited.

**Reference**

**Jeong, S., Trotochaud, A. E. and Clark, S. E.** (1999). The Arabidopsis CLAVATA2 gene encodes a receptor-like protein required for the stability of the CLAVATA1 receptor-like kinase. *Plant Cell* **11**, 1925-1933.

The authors apologise to readers for this mistake.
